# Supplementary material
Source: Springer Nature journal article supplement (https://www.springermedizin.de/resource/supplementary/12875_2010_536_MOESM4_ESM.pdf/9434890)
Supplement: MOESM4 [file 9434890]

**Table 4: Feedback can be given in a variety of forms. How useful would the following methods of offering performance feedback be in enabling you to improve your individual performance?**

| <b>Indicator<br/>(Not at all Useful=1 to Extremely Useful=5)</b>                                                                                                   | <b>MDs</b> | <b>Nursing<br/>+NP</b> | <b>Allied Health<br/>Professionals</b> | <b>Administrative</b> |
|--------------------------------------------------------------------------------------------------------------------------------------------------------------------|------------|------------------------|----------------------------------------|-----------------------|
| Descriptive statistics of patient care processes % of patients with a BP recorded in the chart in the past year, # of patients seen, etc.                          | 3.8 ± 0.8  | 3.9 ± 0.8              | 2.4 ± 1.1                              | 2.8 ± 1.7             |
| Descriptive statistics of patient care outcomes % of patients with hypertension who are well controlled, % of diabetics who are well controlled, etc.              | 4.1 ± 0.8  | 3.9 ± 0.8              | 3.2 ± 1.0                              | 2.8 ± 1.8             |
| Comparison of your FHT to others on patient care processes % of patients with a BP recorded in the chart in the past year, # of patients seen, etc.                | 3.5 ± 1.0  | 3.7 ± 1.0              | 2.7 ± 1.2                              | 2.5 ± 1.7             |
| Comparison of your FHT to others on of patient care outcomes % of patients with hypertension who are well controlled, % of diabetics who are well controlled, etc. | 3.6 ± 0.9  | 3.7 ± 1.0              | 2.7 ± 1.1                              | 2.6 ± 1.7             |
